# Supplementary material
Source: MDPI journal article supplement (https://www.mdpi.com/2073-4441/15/8/1483)
Supplement: s1 [file s1]

# **Geochemical Equilibrium Modelling of the Aqueous Speciation of Select Trace Elements in the Great Lakes**

John Fitzgerald, Colton Bentley, Bas Vriens\*

Department of Geological Sciences & Engineering, Queen's University, Kingston,  
Ontario Canada

\* Corresponding author email: [bas.vriens@queensu.ca](mailto:bas.vriens@queensu.ca)

## **SUPPORTING INFORMATION**

**Table S1. Connecting channel hydrochemistry used in simulations.**

|                  | St Marys River<br>[n=5] |       | St Clair River<br>[n=5] |       | Detroit River<br>[n=4] |       | Niagara River<br>[n=5] |       | St. Lawrence River<br>[n=4] |       |
|------------------|-------------------------|-------|-------------------------|-------|------------------------|-------|------------------------|-------|-----------------------------|-------|
| Parameter        | Average                 | Stdev | Average                 | Stdev | Average                | Stdev | Average                | Stdev | Average                     | Stdev |
| pH               | 7.3                     | 0.05  | 7.4                     | 0.04  | 7.4                    | 0.03  | 7.4                    | 0.04  | 7.5                         | 0.01  |
| ORP              | 193                     | 17    | 186                     | 13    | 183                    | 15    | 172                    | 16    | 175                         | 8     |
| ppm              |                         |       |                         |       |                        |       |                        |       |                             |       |
| Dissolved Oxygen | 8.90                    | 0.3   | 6.30                    | 1.04  | 6.35                   | 1.06  | 5.77                   | 0.45  | 5.55                        | 0.35  |
| Temperature      | 23.3                    | 1.3   | 22.2                    | 0.9   | 23.5                   | 0.4   | 25.0                   | 1.2   | 25.3                        | 2.2   |
| Alkalinity       | 41                      | 6     | 86                      | 8     | 96                     | 12    | 133                    | 5     | 133                         | 2     |
| Chloride         | 1.9                     | 0.8   | 9.1                     | 0.3   | 11.9                   | 1.4   | 16.4                   | 0.2   | 17.1                        | 0.5   |
| Sulfate          | 3.2                     | 0.1   | 12.4                    | 0.2   | 13.2                   | 0.6   | 15.8                   | 0.1   | 17.2                        | 0.9   |
| Na               | 1.4                     | 0.1   | 4.9                     | 0.1   | 3.9                    | 0.1   | 8.6                    | 2     | 11.6                        | 1.6   |
| Mg               | 2.8                     | 0.1   | 7.5                     | 0.8   | 7.5                    | 0.5   | 8.9                    | 1     | 8.5                         | 1     |
| K                | 0.5                     | 0.04  | 1.4                     | 0.1   | 0.9                    | 0.1   | 1.4                    | 0.01  | 2.0                         | 0.2   |
| Ca               | 14                      | 1     | 26                      | 2     | 26                     | 3     | 32                     | 3     | 32                          | 3     |
| ppb              |                         |       |                         |       |                        |       |                        |       |                             |       |
| Phosphate        | 6.0                     | 0.1   | 6.6                     | 0.1   | 8.6                    | 0.2   | 6.9                    | 0.1   | 6.6                         | 0.1   |
| Li               | 0.2                     | 0.06  | 0.3                     | 0.18  | 0.5                    | 0.07  | 1.6                    | 0.11  | 1.1                         | 0.06  |
| Be               | 0.11                    | 0.2   | 0.05                    | 0.09  | 0.01                   | 0.01  | 0.01                   | 0.01  | 0.35                        | 0.24  |
| Al               | 25.8                    | 10.3  | 5.7                     | 2.1   | 9.6                    | 2.7   | 16.7                   | 11.7  | 8.9                         | 2.5   |
| Si               | 4064                    | 1309  | 1189                    | 721   | 637                    | 170   | 800                    | 138   | n/a                         | n/a   |
| Sc               | 0.12                    | 0.20  | 0.09                    | 0.15  | n/a                    | n/a   | n/a                    | n/a   | 0.54                        | 0.06  |
| Ti               | 0.6                     | 0.2   | 0.3                     | 0.1   | 0.4                    | 0.1   | 0.3                    | 0.03  | 0.7                         | 0.2   |
| V                | 0.4                     | 0.27  | 0.2                     | 0.15  | 0.4                    | 0.08  | 0.3                    | 0.02  | 0.7                         | 0.3   |
| Cr               | 0.4                     | 0.17  | 0.2                     | 0.12  | 0.2                    | 0.03  | 0.2                    | 0.09  | 0.5                         | 0.27  |
| Mn               | 5.1                     | 1.1   | 0.4                     | 0.16  | 0.8                    | 0.2   | 2.6                    | 1.7   | 3.5                         | 2.9   |
| Fe               | 71                      | 44    | 5                       | 1     | 17                     | 11    | 114                    | 152   | 31                          | 17    |
| Co               | 0.13                    | 0.22  | 0.06                    | 0.13  | 0.02                   | 0.003 | 0.02                   | 0.004 | 0.41                        | 0.27  |
| Ni               | 1.3                     | 0.9   | 0.3                     | 0.2   | 0.4                    | 0.07  | 0.8                    | 0.03  | 1.3                         | 0.19  |
| Cu               | 2.5                     | 1.5   | 0.5                     | 0.17  | 0.9                    | 0.26  | 1.7                    | 0.86  | 1.7                         | 0.22  |
| Zn               | 4.8                     | 1.7   | 2.4                     | 1.2   | 6.6                    | 2.8   | 17.6                   | 8.7   | 8.0                         | 0.13  |
| Ge               | 0.15                    | 0.2   | 0.14                    | 0.18  | n/a                    | n/a   | 0.01                   | 0.01  | 0.62                        | 0.05  |
| As               | 0.5                     | 0.2   | 0.4                     | 0.2   | 0.7                    | 0.09  | 1.0                    | 0.02  | 1.3                         | 0.3   |
| Se               | 0.3                     | 0.6   | 0.4                     | 0.1   | n/a                    | n/a   | 0.04                   | 0.01  | 0.6                         | 0.12  |
| Rb               | 1.26                    | 0.27  | 0.84                    | 0.21  | 0.88                   | 0.03  | 1.11                   | 0.03  | 1.43                        | 0.25  |
| Sr               | 13                      | 2.5   | 12                      | 5.8   | 24                     | 3.5   | 181                    | 19    | 84                          | 43    |
| Y                | 0.19                    | 0.18  | 0.06                    | 0.12  | 0.03                   | 0.016 | 0.02                   | 0.004 | 0.41                        | 0.27  |
| Zr               | 0.12                    | 0.11  | 0.12                    | 0.14  | n/a                    | n/a   | n/a                    | n/a   | 0.37                        | 0.26  |

**Table S1, cont.**

|           | St Marys River<br>[n=5] |       | St Clair River<br>[n=5] |       | Detroit River<br>[n=4] |       | Niagara River<br>[n=5] |       | St. Lawrence River<br>[n=4] |       |
|-----------|-------------------------|-------|-------------------------|-------|------------------------|-------|------------------------|-------|-----------------------------|-------|
| Parameter | Average                 | Stdev | Average                 | Stdev | Average                | Stdev | Average                | Stdev | Average                     | Stdev |
| Mo        | 0.27                    | 0.26  | 0.35                    | 0.26  | 0.66                   | 0.09  | 1.17                   | 0.04  | 1.40                        | 0.3   |
| Ag        | 0.013                   | 0.02  | 0.07                    | 0.01  | 0.003                  | 0.001 | 0.002                  | 0.001 | 0.43                        | 0.1   |
| Cd        | 0.01                    | 0.02  | 0.06                    | 0.03  | 0.01                   | 0.003 | 0.01                   | 0.001 | 0.04                        | 0.06  |
| In        | 0.09                    | 0.01  | 0.09                    | n/a   | n/a                    | n/a   | n/a                    | n/a   | 0.01                        | 0.01  |
| Sn        | 0.01                    | 0.024 | 0.07                    | 0.03  | 0.02                   | 0.004 | 0.02                   | 0.004 | 0.04                        | 0.01  |
| Sb        | 0.5                     | 0.47  | 0.7                     | 0.42  | 1.3                    | 0.15  | 0.2                    | 0.08  | 0.6                         | 0.16  |
| Cs        | 0.13                    | 0.11  | 0.06                    | 0.13  | 0.02                   | 0.01  | 0.02                   | 0.001 | 0.04                        | 0.01  |
| Ba        | 7                       | 1.9   | 4                       | 4     | 9                      | 0.6   | 22                     | 1.4   | 16                          | 13    |
| La        | 0.03                    | 0.01  | 0.05                    | 0.01  | 0.01                   | 0.003 | 0.02                   | 0.02  | 0.04                        | 0.02  |
| Ce        | 0.01                    | 0.02  | 0.03                    | 0.01  | 0.02                   | 0.006 | 0.03                   | 0.03  | 0.01                        | 0.03  |
| Pr        | n/a                     | n/a   | 0.051                   | 0.02  | 0.002                  | 0.001 | 0.004                  | 0.002 | n/a                         | n/a   |
| Nd        | 0.03                    | 0.02  | 0.06                    | 0.02  | 0.01                   | 0.005 | 0.02                   | 0.008 | 0.04                        | 0.02  |
| Sm        | 0.01                    | 0.02  | 0.005                   | 0.01  | 0.04                   | 0.04  | 0.002                  | 0.001 | 0.01                        | 0.004 |
| Eu        | 0.01                    | 0.01  | 0.02                    | 0.01  | 0.01                   | 0.007 | 0.001                  | n/a   | 0.06                        | 0.001 |
| Gd        | 0.01                    | 0.01  | 0.004                   | 0.01  | 0.02                   | 0.02  | 0.004                  | 0.001 | 0.04                        | 0.005 |
| Tb        | 0.001                   | 0.002 | 0.01                    | 0.01  | 0.001                  | 0.001 | n/a                    | n/a   | 0.003                       | 0.001 |
| Dy        | 0.005                   | 0.002 | 0.005                   | 0.002 | 0.004                  | 0.003 | 0.002                  | 0.001 | 0.004                       | 0.003 |
| Ho        | 0.002                   | 0.002 | 0.004                   | n/a   | 0.001                  | n/a   | n/a                    | n/a   | 0.001                       | n/a   |
| Er        | 0.001                   | 0.001 | 0.001                   | n/a   | 0.002                  | 0.001 | 0.001                  | n/a   | n/a                         | n/a   |
| Tm        | 0.001                   | 0.001 | 0.005                   | 0.001 | n/a                    | n/a   | n/a                    | n/a   | n/a                         | n/a   |
| Yb        | 0.003                   | 0.002 | 0.01                    | 0.01  | 0.001                  | n/a   | 0.002                  | n/a   | 0.004                       | 0.002 |
| Lu        | n/a                     | n/a   | 0.002                   | 0.002 | n/a                    | n/a   | n/a                    | n/a   | n/a                         | n/a   |
| Hf        | 0.01                    | 0.02  | 0.002                   | n/a   | n/a                    | n/a   | n/a                    | n/a   | 0.05                        | n/a   |
| Ta        | 0.03                    | 0.03  | 0.02                    | 0.01  | n/a                    | n/a   | n/a                    | n/a   | 0.01                        | n/a   |
| W         | 0.02                    | 0.02  | 0.01                    | 0.01  | 0.01                   | 0.001 | 0.04                   | 0.01  | 0.04                        | 0.02  |
| Pb        | 0.22                    | 0.04  | 0.12                    | 0.16  | 0.12                   | 0.04  | 0.15                   | 0.03  | 0.45                        | 0.18  |
| Tl        | 0.01                    | 0.07  | 0.01                    | 0.01  | 0.005                  | 0.001 | 0.01                   | 0.001 | 0.03                        | 0.06  |
| Bi        | 0.11                    | 0.04  | 0.05                    | 0.02  | 0.002                  | n/a   | 0.002                  | 0.001 | 0.35                        | 0.001 |
| Th        | 0.12                    | 0.02  | 0.16                    | 0.16  | n/a                    | n/a   | n/a                    | n/a   | 0.05                        | 0.04  |
| U         | 0.26                    | 0.14  | 0.24                    | 0.11  | 0.22                   | 0.16  | 0.32                   | 0.08  | 0.64                        | 0.28  |

**Table S2. Extrapolated parameters used in simulations (relative to 2021 data).**

| <b>Lake</b>        | <b>Connecting Channel</b> | <b>2050</b>                    | <b>2100</b> |
|--------------------|---------------------------|--------------------------------|-------------|
|                    |                           | <b><i>Alkalinity [ppb]</i></b> |             |
| Superior           | St Mary's                 | +580                           | +1,580      |
| Huron              | St Clair, Detroit         | +1,131                         | +3,081      |
| East Erie, Ontario | Niagara, St. Lawrence     | +4,321                         | +11,771     |
|                    |                           | <b><i>Phosphate [ppb]</i></b>  |             |
| Superior           | St. Mary's                | 5                              |             |
| Huron              | St. Clair, Detroit        | 5                              |             |
| East Erie, Ontario | Niagara, St. Lawrence     | 10                             |             |
|                    |                           | <b><i>Chloride [ppb]</i></b>   |             |
| Superior           | St. Mary's                | +186                           | +506        |
| Huron              | St. Clair, Detroit        | +1,183                         | +3,223      |
| East Erie, Ontario | Niagara, St. Lawrence     | +4,503                         | +12,269     |
